# Supplementary material for: Methylome evolution in plants
Source: PubMed Central journal article supplement (PMC5175322; doi:10.1186/s13059-016-1127-5), 2016-12-20
Supplement: 13059_2016_1127_MOESM1_ESM.pdf [file 13059_2016_1127_MOESM1_ESM.pdf]

## Additional file 1

Plant species whose methylomes have been analyzed by whole-genome bisulfite sequencing (WGBS-seq) or high-performance liquid chromatography (HPLC)

| Species                        | Family           | WGBS-seq | HPLC | Species                           | Family           | WGBS-seq | HPLC |
|--------------------------------|------------------|----------|------|-----------------------------------|------------------|----------|------|
| <i>Amborella trichopoda</i>    | Amborellaceae    | Genome   |      | <i>Medicago truncatula</i>        | Fabaceae         | Genome   |      |
| <i>Aquilegia nevadensis</i>    | Ranunculaceae    |          | X    | <i>Metroxylon sagu</i>            | Arecaceae        |          | X    |
| <i>Aquilegia vulgaris</i>      | Ranunculaceae    |          | X    | <i>Mimulus guttatus</i>           | Phrymaceae       | Genome   |      |
| <i>Arabidopsis lyrata</i>      | Brassicaceae     | Genome   |      | <i>Myrtus communis</i>            | Myrtaceae        |          | X    |
| <i>Arabidopsis thaliana</i>    | Brassicaceae     | Genome   | X    | <i>Narcissus bugei</i>            | Amaryllidaceae   |          | X    |
| <i>Aristolochia fimbriata</i>  | Aristolochiaceae | EST      |      | <i>Narcissus longispathus</i>     | Amaryllidaceae   |          | X    |
| <i>Asplenium nidus</i>         | Aspleniaceae     | RNA-seq  |      | <i>Narcissus nevadensis</i>       | Amaryllidaceae   |          | X    |
| <i>Beta vulgaris</i>           | Chenopodiaceae   | Genome   |      | <i>Nicotiana tabacum</i>          | Solanaceae       |          | X    |
| <i>Brachypodium distachyon</i> | Poaceae          | Genome   |      | <i>Nuphar advena</i>              | Nymphaeaceae     | EST      |      |
| <i>Brassica napus</i>          | Brassicaceae     |          | X    | <i>Olea europaea</i>              | Oleaceae         |          | X    |
| <i>Brassica oleracea</i>       | Brassicaceae     | Genome   | X    | <i>Oryza sativa</i>               | Poaceae          | Genome   | X    |
| <i>Brassica rapa</i>           | Brassicaceae     | Genome   |      | <i>Panicum hallii</i>             | Poaceae          | Genome   |      |
| <i>Cannabis sativa</i>         | Cannabaceae      | Genome   |      | <i>Panicum virgatum</i>           | Poaceae          | Genome   | X    |
| <i>Capsella rubella</i>        | Brassicaceae     | Genome   |      | <i>Pennisetum glaucum</i>         | Poaceae          |          | X    |
| <i>Cichorium intybus</i>       | Asteraceae       |          | X    | <i>Phillyrea latifolia</i>        | Oleaceae         |          | X    |
| <i>Citrus clementina</i>       | Rutaceae         | Genome   |      | <i>Physcomitrella patens</i>      | Funariaceae      | Genome   |      |
| <i>Crocus sativus</i>          | Iridaceae        | Genome   |      | <i>Picea glauca</i>               | Pinaceae         | RNA-seq  |      |
| <i>Cycas rumphii</i>           | Cycadaceae       | EST      |      | <i>Pinguicula vulgaris</i>        | Lentibulariaceae | Genome   |      |
| <i>Cymbidium pumilum</i>       | Orchidaceae      |          | X    | <i>Pinus taeda</i>                | Pinaceae         | Genome   |      |
| <i>Daphne blagayana</i>        | Thymelaeaceae    |          | X    | <i>Pisum sativum</i>              | Fabaceae         |          | X    |
| <i>Daphne laureola</i>         | Thymelaeaceae    |          | X    | <i>Populus trichocarpa</i>        | Salicaceae       | Genome   |      |
| <i>Daphne mezereum</i>         | Thymelaeaceae    |          | X    | <i>Primula vulgaris</i>           | Primulaceae      |          | X    |
| <i>Echinochloa frumentacea</i> | Poaceae          |          | X    | <i>Prunus persica</i>             | Rosaceae         | Genome   |      |
| <i>Elaeis guineensis</i>       | Arecaceae        |          | X    | <i>Pteridium aquilinum</i>        | Dennstaedtiaceae | RNA-seq  |      |
| <i>Eleusine coracana</i>       | Poaceae          |          | X    | <i>Pyrus communis</i>             | Rosaceae         |          | X    |
| <i>Erodium cazorlanum</i>      | Geraniaceae      |          | X    | <i>Quercus ilex</i>               | Fagaceae         |          | X    |
| <i>Eucalyptus grandis</i>      | Myrtaceae        | Genome   |      | <i>Quercus suber</i>              | Fagaceae         |          | X    |
| <i>Eutrema salsugineum</i>     | Brassicaceae     | Genome   |      | <i>Rhinanthus minor</i>           | Orobanchaceae    |          | X    |
| <i>Fragaria vesca</i>          | Rosaceae         | Genome   |      | <i>Ricinus communis</i>           | Euphorbiaceae    | Genome   |      |
| <i>Gentiana pannonica</i>      | Gentianaceae     |          | X    | <i>Rosmarinus officinalis</i>     | Lamiaceae        |          | X    |
| <i>Glycine max</i>             | Fabaceae         | Genome   |      | <i>Secale cereale</i>             | Poaceae          |          | X    |
| <i>Gossypium hirsutum</i>      | Malvaceae        |          | X    | <i>Selaginella moellendorffii</i> | Selaginellaceae  | Genome   |      |
| <i>Gossypium raimondii</i>     | Malvaceae        | Genome   |      | <i>Setaria italica</i>            | Poaceae          |          | X    |
| <i>Helianthus annuus</i>       | Asteraceae       |          | X    | <i>Setaria viridis</i>            | Poaceae          | Genome   |      |
| <i>Helleborus foetidus</i>     | Ranunculaceae    |          | X    | <i>Sinapis alba</i>               | Brassicaceae     |          | X    |
| <i>Helleborus lividus</i>      | Ranunculaceae    |          | X    | <i>Solanum lycopersicum</i>       | Solanaceae       | Genome   | X    |
| <i>Ilex aquifolium</i>         | Aquifoliaceae    |          | X    | <i>Solanum tuberosum</i>          | Solanaceae       |          | X    |
| <i>Lavandula latifolia</i>     | Lamiaceae        |          | X    | <i>Sorghum bicolor</i>            | Poaceae          | Genome   | X    |
| <i>Lepidium sativum</i>        | Brassicaceae     |          | X    | <i>Stellaria longipes</i>         | Caryophyllaceae  |          | X    |
| <i>Linum usitatissimum</i>     | Linaceae         |          | X    | <i>Theobroma cacao</i>            | Malvaceae        | Genome   |      |
| <i>Liriodendron tulipifera</i> | Magnoliaceae     | EST      |      | <i>Triticum aestivum</i>          | Poaceae          |          | X    |
| <i>Lobularia maritima</i>      | Brassicaceae     |          | X    | <i>Vicia faba</i>                 | Fabaceae         |          | X    |
| <i>Lotus japonicus</i>         | Fabaceae         | Genome   |      | <i>Viola cazorlensis</i>          | Violaceae        |          | X    |
| <i>Malus domestica</i>         | Rosaceae         | Genome   |      | <i>Viscum album</i>               | Viscaceae        |          | X    |
| <i>Manihot esculenta</i>       | Euphorbiaceae    | Genome   |      | <i>Vitis vinifera</i>             | Vitaceae         | Genome   |      |
| <i>Marchantia polymorpha</i>   | Marchantiaceae   | RNA-seq  |      | <i>Zea mays</i>                   | Poaceae          | Genome   | X    |

Abbreviation: EST, expressed sequence tags
