# Supplementary material for: Methylome evolution in plants
Source: PubMed Central journal article supplement (PMC5175322; doi:10.1186/s13059-016-1127-5), 2016-12-20
Supplement: 13059_2016_1127_MOESM2_ESM.pdf [file 13059_2016_1127_MOESM2_ESM.pdf]

**Figure S1**

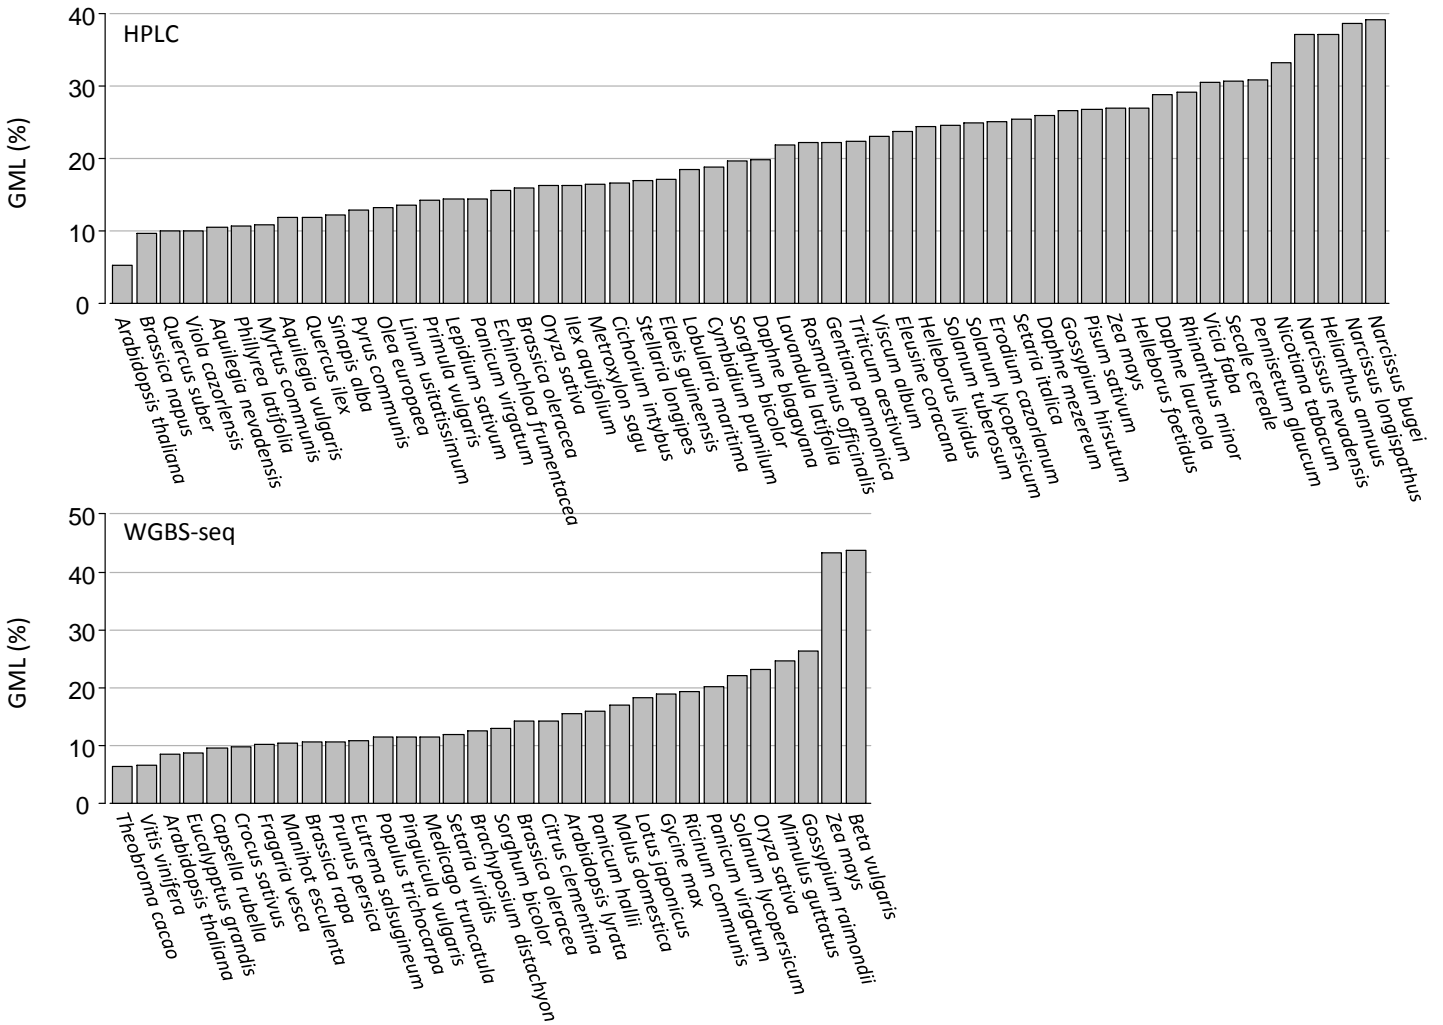

Figure S1: GMLs of plant species whose methylomes have been analyzed by whole genome bisulfite sequencing (WGBS-seq) or high-performance liquid chromatography (HPLC)

**Figure S2**

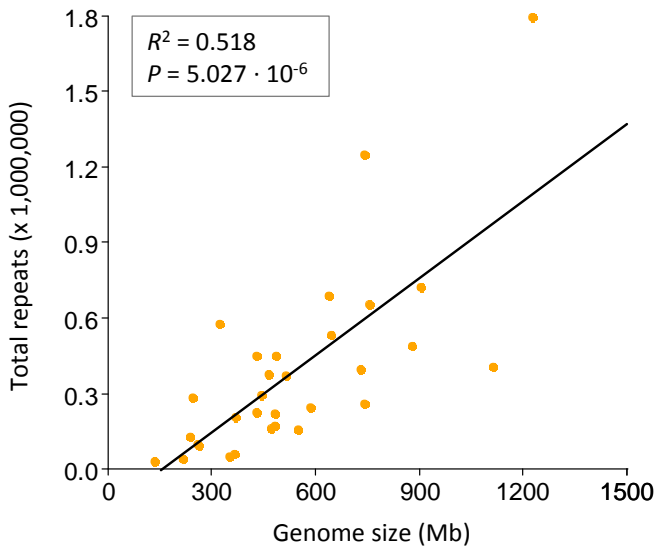

Figure S2: Correlation between genome size and total number of repeats in the genome, using the taxa presented in S1
